# Supplementary material for: Mycotoxin Contamination Status of Cereals in China and Potential Microbial Decontamination Methods
Source: MDPI journal article supplement (doi:10.3390/metabo13040551), 2023-04-12
Supplement: s1 [file s1]

SUPPLEMENTARY MATERIALS

# **Mycotoxin Contamination Status of Cereals in China and Potential Microbial Decontamination Methods**

**Jing Zhang <sup>1,2</sup>, Xi Tang <sup>1</sup>, Yifan Cai <sup>1</sup> and Wen-Wen Zhou <sup>1,\*</sup>**

<sup>1</sup> College of Biosystems Engineering and Food Science, Ningbo Research Institute, Zhejiang University, Hangzhou 310058, Zhejiang, China

<sup>2</sup> School of Chemical and Biomolecular Engineering, The University of Sydney, Sydney, NSW 2006, Australia

\* Correspondence: [vivianzhou11@zju.edu.cn](mailto:vivianzhou11@zju.edu.cn)

Table S1. Sources of active microbial substances inhibiting toxin-producing molds and mycotoxins and their conditions of action

| Microbial source                          | Active substances                                                                                | Target mold                               | Mold inhibition (%) | Target mycotoxin | Mycotoxin inhibition (%) | Suppressing conditions | Reference |
|-------------------------------------------|--------------------------------------------------------------------------------------------------|-------------------------------------------|---------------------|------------------|--------------------------|------------------------|-----------|
| <i>Bacillus amyloliquefaciens</i> UTB2    | Protease                                                                                         | <i>Aspergillus parasiticus</i>            | 90                  | Aflatoxins       | 100                      | 37°C, pH > 8           | [1]       |
| <i>Bacillus subtilis</i> UTB3             |                                                                                                  |                                           | 92                  | Aflatoxins       | 100                      |                        |           |
| <i>Bacillus megaterium</i> CGMCC7086      | Three peptides (D1O, D1N, D2N)                                                                   | -                                         | -                   | Aflatoxins       | 70.0–80.0                | 28°C                   | [2]       |
| <i>Lactobacillus gasseri</i> 1A-TV        | Acidocin A and helveticin J                                                                      | -                                         | -                   | Aflatoxins       | 100                      | 37°C                   | [3]       |
| <i>Lactiplantibacillus plantarum</i> K35  | Lactic acid, 2-butyl-4-hexyloctahydro-1H-indene, oleic acid, palmitic acid, and other substances | <i>Aspergillus flavus</i> TISTR3041       | 100                 | Aflatoxins       | 100                      | 37°C, pH = 6.5 ± 0.1   | [4]       |
|                                           |                                                                                                  | <i>Aspergillus parasiticus</i> TISTR 3276 | 100                 | Aflatoxins       | 100                      |                        |           |
| <i>Lactiplantibacillus plantarum</i> UM55 | Organic acids (lactic acid, phenyllactic acid, hydroxyphenyllactic acid, and indole lactic acid) | <i>Aspergillus flavus</i> MUM 17.14       | 32                  | Aflatoxins       | 91                       | 25°C, pH = 7           | [5]       |
| <i>Lactiplantibacillus plantarum</i> IS10 | Peptides                                                                                         | <i>Aspergillus flavus</i> MD3             | 44                  | -                | -                        | 30°C                   | [6]       |
| <i>Lactiplantibacillus plantarum</i> 21B  | Phenyllactic and <i>p</i> -hydroxyphenyllactic acids                                             | <i>Aspergillus flavus</i> FTDC3226        | 86.5 ± 5.5          | -                | -                        | 26 or 30°C, pH = 4.8   | [7]       |

|                                          |                                                               |                                           |       |            |       |      |      |
|------------------------------------------|---------------------------------------------------------------|-------------------------------------------|-------|------------|-------|------|------|
| <i>Lactiplantibacillus plantarum</i> AF1 | C <sub>12</sub> H <sub>22</sub> N <sub>2</sub> O <sub>2</sub> | <i>Aspergillus flavus</i> ATCC 22546      | -     | -          | -     | 30°C | [8]  |
| <i>Saccharomyces cerevisiae</i> 117      | 4-Hydroxyphenethyl alcohol                                    | <i>Aspergillus flavus</i> Z103            | 83    | Aflatoxins | 99.8  | 28°C | [9]  |
| <i>Pichia anomala</i> WRL-076            | 2-phenylethanol                                               | <i>Aspergillus flavus</i>                 | -     | -          | -     | 28°C | [10] |
| <i>Spirulina platensis</i>               | Phenolic compounds                                            | <i>Aspergillus flavus</i>                 | 56    | -          | -     | 24°C | [11] |
| <i>Pichia anomala</i> ATCC 34080         | Exo-chitinase, β-1,3-glucanase                                | <i>Aspergillus flavus</i>                 | -     | -          | -     | 28°C | [12] |
| <i>Streptomyces</i> sp.MRI142            | Aflastatin A                                                  | <i>Aspergillus parasiticus</i> NRRL 2999  | 100   | Aflatoxins | 100   | 26°C | [13] |
| <i>Streptomyces</i> sp. SA-2581          | Diocatin A                                                    | <i>Aspergillus parasiticus</i> ATCC 26691 | 98    | -          | -     | 28°C | [14] |
| <i>Streptomyces alboflavus</i> TD-1      | Dimethyl trisulfide and benzenamine                           | <i>Aspergillus flavus</i>                 | 100   | Aflatoxins | 100   | 28°C | [15] |
| <i>Streptomyces yansingensis</i> 3-10    | Reveromycins A and B                                          | <i>Aspergillus flavus</i>                 | 91.91 | Aflatoxins | 93.38 | 28°C | [16] |

|                                                                                                                           |                                    |                                                                |              |              |              |                |      |
|---------------------------------------------------------------------------------------------------------------------------|------------------------------------|----------------------------------------------------------------|--------------|--------------|--------------|----------------|------|
| <i>Enterbacter asburiae</i> VT-7                                                                                          | 1-Pentanol and Phenylethyl alcohol | <i>Aspergillus flavus</i>                                      | 100          | Aflatoxins   | 100          | 28°C           | [17] |
| <i>Trichoderma harzianum</i> GIM 3.442                                                                                    | Proteases                          | <i>Aspergillus flavus</i>                                      | 26.1         | -            | -            | 25°C           | [18] |
| <i>Pseudomonas fluorescens</i> PB27                                                                                       | Chitinase                          | <i>Aspergillus flavus</i>                                      | 20           | -            | -            | 25°C           | [19] |
| <i>Candida nivariensis</i> DMKU-CE18                                                                                      | 1-Pentanol                         | <i>Aspergillus flavus</i> A39                                  | 64.90 ± 7.00 | Aflatoxins   | 74.80 ± 6.50 | 28°C           | [20] |
| <i>Bacillus pumilus</i>                                                                                                   | -                                  | <i>Aspergillus parasiticus</i> NRRL 2999                       | 56.4         | Aflatoxins   | 99.9         | 25°C, pH = 6.5 | [21] |
| <i>Lactobacillus sanfrancisco</i> CB1                                                                                     | Organic acids                      | <i>Fusarium graminearum</i> 623, <i>Penicillium</i>            | 100          | -            | -            | 30°C           | [22] |
| <i>Bacillus subtilis</i>                                                                                                  | Peptidolipid                       | <i>Aspergillus ochraceus</i> SRRC 335                          | -            | -            | -            | 25°C           | [23] |
| <i>Streptomyces natalensis</i>                                                                                            | Natamycin                          | <i>Aspergillus carbonarius</i>                                 | -            | Ochratoxin A | 100          | 20°C           | [24] |
| Four yeast strains ( <i>Cyberlindnera jadinii</i> 273, <i>Candida friedrichii</i> 778, <i>Candida intermedia</i> 235, and | 2-Phenylethanol                    | <i>Aspergillus carbonarius</i> and <i>Aspergillus ochraeus</i> | 30.0–50.0    | Ochratoxin A | 56.0–74.0    | 25°C           | [25] |

|                                                                            |                                                     |                                        |     |                 |       |          |      |
|----------------------------------------------------------------------------|-----------------------------------------------------|----------------------------------------|-----|-----------------|-------|----------|------|
| <i>Pichia anomala</i> , <i>P. kluyveri</i> and <i>Hanseniaspora uvarum</i> | 2-phenyl ethyl acetate                              | <i>Aspergillus ochraceus</i>           | 100 | Ochratoxin A    | 100   | 30°C     | [26] |
| <i>Bacillus licheniformis</i> BL350-2                                      | 3-Methy-1-butanol                                   | <i>Aspergillus westerdijikiae</i> BA1  | 62  | -               | -     | 26°C     | [27] |
|                                                                            |                                                     | <i>Aspergillus carbonarius</i> MG7     | 60  |                 |       |          |      |
|                                                                            |                                                     | <i>Penicillium verrucosum</i> MC12     | 53  |                 |       |          |      |
|                                                                            |                                                     | <i>Aspergillus Niger</i> MC05          | 50  |                 |       |          |      |
|                                                                            |                                                     | <i>Aspergillus ochraceus</i> MD1       | 44  |                 |       |          |      |
|                                                                            |                                                     | <i>Aspergillus ochraceus</i> CM5       | -   | Ochratoxin A    | 100   |          |      |
| <i>Bacillus pumilus</i>                                                    | Cyclic polypeptide or non-peptidic compound         | <i>Aspergillus ochraceus</i> NRRL 3174 | 76  | Ochratoxin A    | 71    | 25°C     | [28] |
| <i>Nannochloropsis</i> sp.                                                 | Phenolic acids                                      | <i>Fusarium graminearum</i>            | 67  | Deoxynival enol | 100   | 25°C     | [29] |
| <i>Spirulina</i> sp.                                                       | Phenolic acids                                      | <i>Fusarium graminearum</i>            | 62  | Deoxynival enol | 62    | 25°C     |      |
| <i>Bacillus vallismortis</i> ZZ185                                         | Bacillomycin D (n-C14) and Bacillomycin D (iso-C15) | <i>Fusarium graminearum</i>            | 50  | -               | -     | 30°C     | [30] |
| <i>Ascophyum nodosum</i>                                                   | Probiotic and seaweed extract                       | <i>Fusarium graminearum</i>            | 100 | Zearalenone     | 100   | 25 ± 2°C | [31] |
| <i>Pediococcus pentosaceus</i>                                             | Purified bacteriocin                                | <i>Fusarium graminearum</i>            | 100 | Zearalenone     | 97.43 | 25 ± 2°C | [32] |

|                                         |                                  |                                    |              |                |    |      |      |
|-----------------------------------------|----------------------------------|------------------------------------|--------------|----------------|----|------|------|
| <i>Bacillus amyloliquefaciens</i> DA12  | Iturin A and volatile heptanones | <i>Fusarium graminearum</i> Z-3639 | 70.50 ± 1.10 | -              | -  | 30°C | [33] |
|                                         |                                  | <i>Fusarium graminearum</i> H-11   | 71.30 ± 1.10 |                |    |      |      |
|                                         |                                  | <i>Fusarium graminearum</i> H7-4   | 74.00 ± 2.70 |                |    |      |      |
|                                         |                                  | <i>Fusarium graminearum</i> H7-11  | 72.50 ± 0.60 |                |    |      |      |
| <i>Bacillus amyloliquefaciens</i> S76-3 | Iturin A and plipastatin A       | <i>Fusarium graminearum</i>        | 100          | -              | -  | 28°C | [34] |
| <i>Pediococcus acidilactici</i> KTU05-7 | Fermented permeate               | -                                  | -            | Deoxynivalenol | 23 | 32°C | [35] |
| <i>Latilactobacillus sakei</i>          |                                  |                                    |              | Zearalenone    | 73 | 30°C |      |
| <i>Pediococcus pentosaceus</i>          |                                  |                                    |              | HT-2           | 58 | 35°C |      |
| <i>Pediococcus acidilactici</i>         |                                  |                                    |              | T-2            | 34 | 32°C |      |

## References

1. Siahmoshteh, F.; Hamidi-Esfahani, Z.; Spadaro, D.; Shams-Ghahfarokhi, M.; Razzaghi-Abyaneh, M. Unraveling the mode of antifungal action of *Bacillus subtilis* and *Bacillus amyloliquefaciens* as potential biocontrol agents against aflatoxigenic *Aspergillus parasiticus*. *Food Control* **2018**, *89*, 300–307.
2. Chen, Y.; Kong, Q.; Liang, Y. Three newly identified peptides from *Bacillus megaterium* strongly inhibit the growth and aflatoxin B<sub>1</sub> production of *Aspergillus flavus*. *Food Control* **2019**, *95*, 41–49.
3. Scillato, M.; Spitale, A.; Mongelli, G.; Privitera, G.F.; Mangano, K.; Cianci, A.; Stefani, S.; Santagati, M. Antimicrobial properties of *Lactobacillus* cell-free supernatants against multidrug-resistant urogenital pathogens. *MicrobiologyOpen* **2021**, *10*, e1173.
4. Sangmanee, P.; Hongpattarakere, T. Inhibitory of multiple antifungal components produced by *Lactobacillus plantarum* K35 on growth, aflatoxin production and ultrastructure alterations of *Aspergillus flavus* and *Aspergillus parasiticus*. *Food Control* **2014**, *40*, 224–233.
5. Guimarães, A.; Santiago, A.; Teixeira, J.A.; Venâncio, A.; Abrunhosa, L. Anti-aflatoxigenic effect of organic acids produced by *Lactobacillus plantarum*. *Int. J. Food Microbiol.* **2018**, *264*, 31–38.
6. Muhialdin, B.J.; Hassan, Z.; Bakar, F.A.; Saari, N. Identification of antifungal peptides produced by *Lactobacillus plantarum* IS10 grown in the MRS broth. *Food Control* **2016**, *59*, 27–30.
7. Lavermicocca, P.; Valerio, F.; Evidente, A.; Lazzaroni, S.; Corsetti, A.; Gobbetti, M. Purification and Characterization of Novel Antifungal Compounds from the Sourdough *Lactobacillus plantarum* Strain 21B. *Appl. Environ. Microbiol.* **2000**, *66*, 4084–4090.
8. Yang, E.J.; Chang, H.C. Purification of a new antifungal compound produced by *Lactobacillus plantarum* AF<sub>1</sub> isolated from kimchi. *Int. J. Food Microbiol.* **2010**, *139*, 56–63.
9. Abdel-Kareem, M.M.; Rasmey, A.M.; Zohri, A.A. The action mechanism and biocontrol potentiality of novel isolates of *Saccharomyces cerevisiae* against the aflatoxigenic *Aspergillus flavus*. *Lett. Appl. Microbiol.* **2019**, *68*, 104–111.
10. Hua, S.S.T.; Beck, J.J.; Sarreal, S.B.L.; Gee, W. The major volatile compound 2-phenylethanol from the biocontrol yeast, *Pichia anomala*, inhibits growth and expression of aflatoxin biosynthetic genes of *Aspergillus flavus*. *Mycotoxin Res.* **2014**, *30*, 71–78.
11. Souza, M.M.d.; Prietto, L.; Ribeiro, A.C.; Souza, T.D.d.; Badiale-Furlong, E. Assessment of the antifungal activity of *Spirulina platensis* phenolic extract against *Aspergillus flavus*. *Ciênc Agrotecnol.* **2011**, *35*, 1050–1058.
12. Tayel, A.A.; El-Tras, W.F.; Moussa, S.H.; El-Agamy, M.A. Antifungal action of *Pichia anomala* against aflatoxigenic *Aspergillus flavus* and its application as a feed supplement. *J. Sci. Food Agric.* **2013**, *93*, 3259–3263.
13. Ono, M.; Sakuda, S.; Suzuki, A.; Isogai, A. Aflastatin A, a novel inhibitor of aflatoxin production by aflatoxigenic fungi. *J. Antibiot.* **1997**, *50*, 111–118.
14. Yoshinari, T.; Akiyama, T.; Nakamura, K.; Kondo, T.; Takahashi, Y.; Muraoka, Y.; Nonomura, Y.; Nagasawa, H.; Sakuda, S. Diocatin A is a strong inhibitor of aflatoxin production by *Aspergillus parasiticus*. *Microbiology* **2007**, *153*, 2774–2780.
15. Yang, M.; Lu, L.; Pang, J.; Hu, Y.; Guo, Q.; Li, Z.; Wu, S.; Liu, H.; Wang, C. Biocontrol activity of volatile organic compounds from *Streptomyces alboblavus* TD-1 against *Aspergillus flavus* growth and aflatoxin production. *J. Microbiol.* **2019**, *57*, 396–404.
16. Shakeel, Q.; Lyu, A.; Zhang, J.; Wu, M.; Li, G.; Hsiang, T.; Yang, L. Biocontrol of *Aspergillus flavus* on Peanut Kernels Using *Streptomyces yanglinensis* 3-10. *Front. Microbiol.* **2018**, *9*, 1049.
17. Gong, A.-D.; Dong, F.-Y.; Hu, M.-J.; Kong, X.-W.; Wei, F.-F.; Gong, S.-J.; Zhang, Y.-M.; Zhang, J.-B.; Wu, A.-B.; Liao, Y.-C. Antifungal activity of volatile emitted from *Enterobacter asburiae* Vt-7 against *Aspergillus flavus* and aflatoxins in peanuts during storage. *Food Control* **2019**, *106*, 106718.

18. Deng, J.J.; Huang, W.Q.; Li, Z.W.; Lu, D.L.; Zhang, Y.; Luo, X.C. Biocontrol activity of recombinant aspartic protease from *Trichoderma harzianum* against pathogenic fungi. *Enzyme Microb. Technol.* **2018**, *112*, 35–42.
19. Akocak, P.B.; Churey, J.J.; Worobo, R.W. Antagonistic effect of chitinolytic *Pseudomonas* and *Bacillus* on growth of fungal hyphae and spores of aflatoxigenic *Aspergillus flavus*. *Food Biosci.* **2015**, *10*, 48–58.
20. Jaibangyang, S.; Nasanit, R.; Limtong, S. Biological control of aflatoxin-producing *Aspergillus flavus* by volatile organic compound-producing antagonistic yeasts. *BioControl* **2020**, *65*, 377–386.
21. Munimbazi, C.; Bullerman, L.B. Inhibition of aflatoxin production of *Aspergillus parasiticus* NRRL 2999 by *Bacillus pumilus*. *Mycopathologia* **1997**, *140*, 163–169.
22. Corsetti, A.; Gobetti, M.; Rossi, J.; Damiani, P. Antimould activity of sourdough lactic acid bacteria: identification of a mixture of organic acids produced by *Lactobacillus sanfrancisco* CB1. *Appl. Microbiol. Biotechnol.* **1998**, *50*, 253–256.
23. Klich, M.A.; Lax, A.R.; Bland, J.M. Inhibition of some mycotoxigenic fungi by iturin A, a peptidolipid produced by *Bacillus subtilis*. *Mycopathologia* **1991**, *116*, 77–80.
24. Medina, Á.; Jiménez, M.; Mateo, R.; Magan, N. Efficacy of natamycin for control of growth and ochratoxin A production by *Aspergillus carbonarius* strains under different environmental conditions. *J. Appl. Microbiol.* **2007**, *103*, 2234–2239.
25. Farbo, M.G.; Urgghe, P.P.; Fiori, S.; Marcello, A.; Oggiano, S.; Balmas, V.; Hassan, Z.U.; Jaoua, S.; Migheli, Q. Effect of yeast volatile organic compounds on ochratoxin A-producing *Aspergillus carbonarius* and *A. ochraceus*. *Int. J. Food Microbiol.* **2018**, *284*, 1–10.
26. Masoud, W.; Poll, L.; Jakobsen, M. Influence of volatile compounds produced by yeasts predominant during processing of *Coffea arabica* in East Africa on growth and ochratoxin A (OTA) production by *Aspergillus ochraceus*. *Yeast* **2005**, *22*, 1133–1142.
27. Ul Hassan, Z.; Al Thani, R.; Alnaimi, H.; Migheli, Q.; Jaoua, S. Investigation and Application of *Bacillus licheniformis* Volatile Compounds for the Biological Control of Toxigenic *Aspergillus* and *Penicillium* spp. *ACS Omega* **2019**, *4*, 17186–17193.
28. Munimbazi, C.; Bullerman, L.B. Isolation and partial characterization of antifungal metabolites of *Bacillus pumilus*. *J. Appl. Microbiol.* **1998**, *84*, 959–968.
29. Scaglioni, P.T.; de Oliveira Garcia, S.; Badiale-Furlong, E. Inhibition of *in vitro* trichothecenes production by microalgae phenolic extracts. *Food Res. Int.* **2019**, *124*, 175–180.
30. Zhao, Z.; Wang, Q.; Wang, K.; Brian, K.; Liu, C.; Gu, Y. Study of the antifungal activity of *Bacillus vallismortis* ZZ185 *in vitro* and identification of its antifungal components. *Bioresour. Technol.* **2010**, *101*, 292–297.
31. Shatha, A.; Shafiq, S. Antagonistic activity of probiotic and sea weed extract against vegetative growth for some fungi and Zearalenone production. *World J. Pharm. Res.* **2015**, *4*, 1577–1585.
32. Mahdi, L.H.; Shafiq, S.A.; Ajaa, H. Effects of crude and purified bacteriocin of *Pediococcus pentosaceus* on the growth and zearalenone production by *Fusarium graminearum*. *Int. J. Curr Eng. Technol.* **2013**, *4*, 2277–4106.
33. Lee, T.; Park, D.; Kim, K.; Lim, S.M.; Yu, N.H.; Kim, S.; Kim, H.-Y.; Jung, K.S.; Jang, J.Y.; Park, J.-C.; et al. Characterization of *Bacillus amyloliquefaciens* DA12 Showing Potent Antifungal Activity against Mycotoxigenic *Fusarium* Species. *Plant Pathol. J.* **2017**, *33*, 499–507.
34. Gong, A.-D.; Li, H.-P.; Yuan, Q.-S.; Song, X.-S.; Yao, W.; He, W.-J.; Zhang, J.-B.; Liao, Y.-C. Antagonistic Mechanism of Iturin A and Plipastatin A from *Bacillus amyloliquefaciens* S76-3 from Wheat Spikes against *Fusarium graminearum*. *PLoS ONE* **2015**, *10*, e0116871.
35. Juodeikiene, G.; Bartkiene, E.; Cernauskas, D.; Cizeikiene, D.; Zadeike, D.; Lele, V.; Bartkevics, V. Antifungal activity of lactic acid bacteria and their application for *Fusarium* mycotoxin reduction in malting wheat grains. *LWT* **2018**, *89*, 307–314.
